# Supplementary material for: Meta-analysis of intramuscular fatty acid composition of Mediterranean lambs
Source: Copernicus journal article supplement (doi:10.5194/aab-59-1-2016), 2016-01-15
Supplement: Supplementary file 1 [file aab-59-1-2016-supplement.pdf]

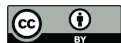

*Supplement of*

## **Meta-analysis of intramuscular fatty acid composition of Mediterranean lambs**

**A. Kaić et al.**

*Correspondence to:* A. Kaić (akaic@agr.hr)

The copyright of individual parts of the supplement might differ from the CC-BY 3.0 licence.

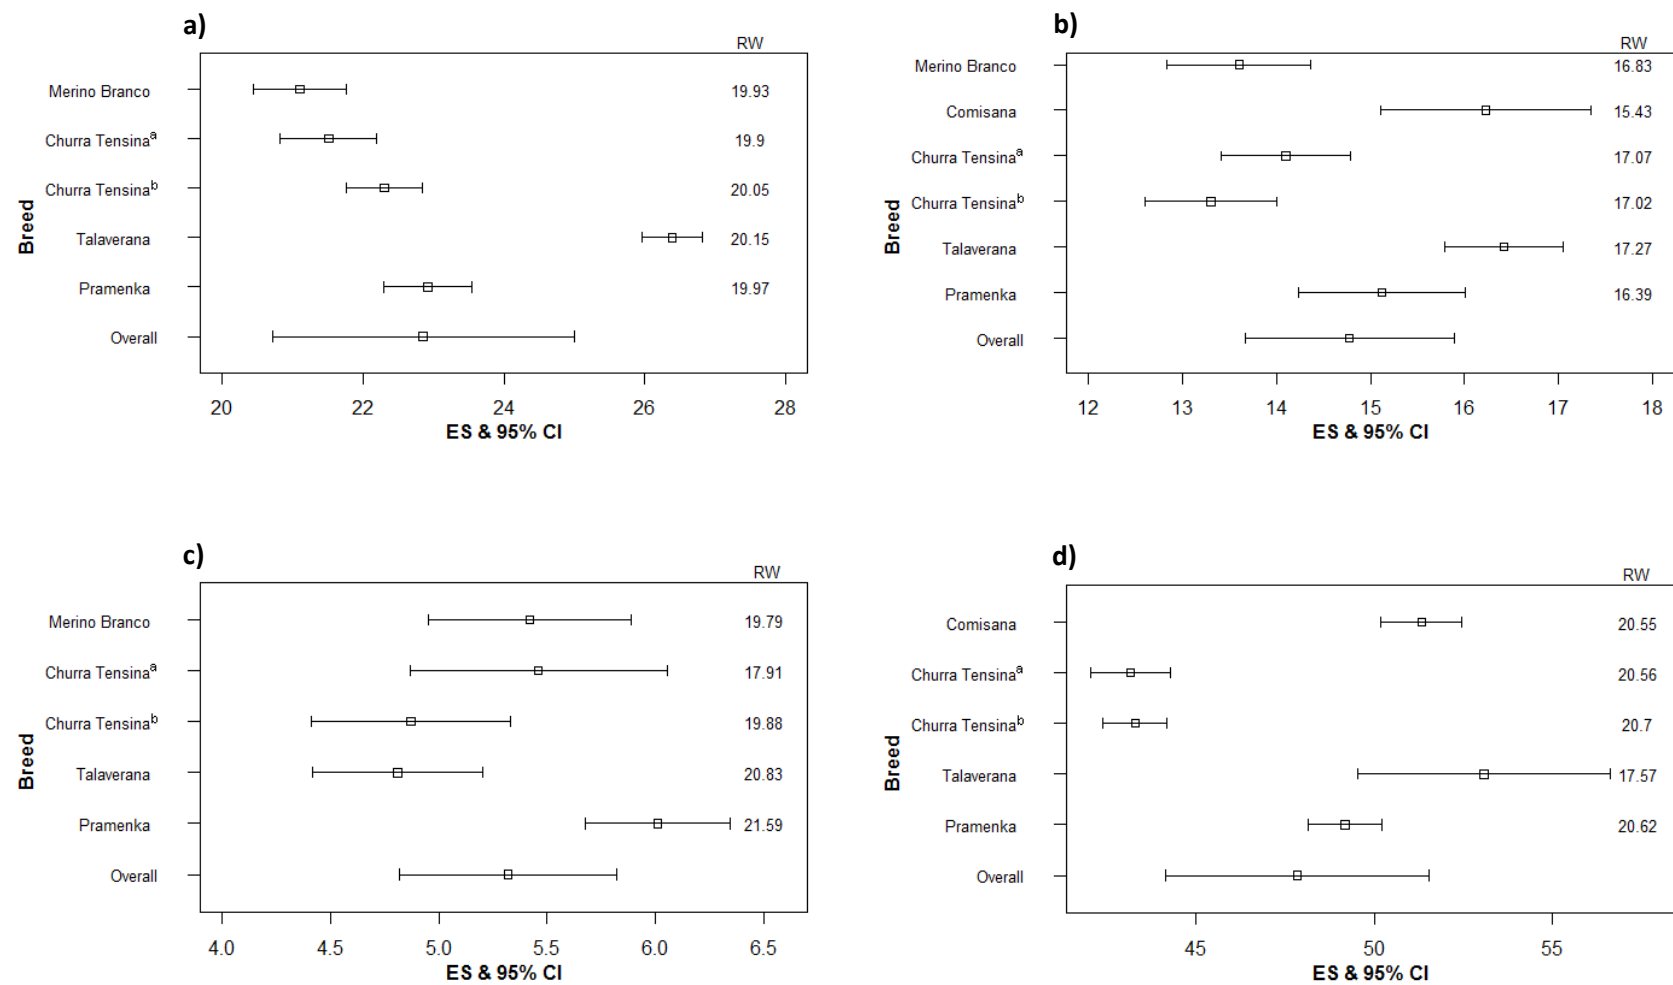

**Figure 1.** Meta-analysis of C16:0 (a), C18:0 (b), C14:0 (c) and SFA (d). <sup>a, b</sup>: different letters in superscript indicate lambs of the same breed included in different studies; CI: confidence interval; RW: relative weight of the study; Overall: overall pooled result.

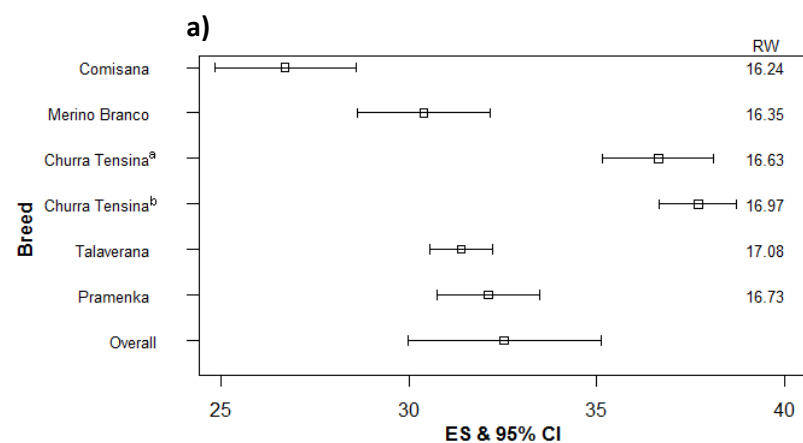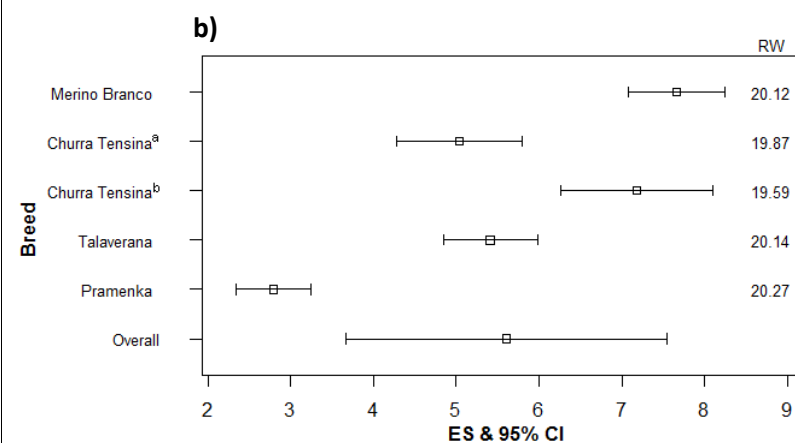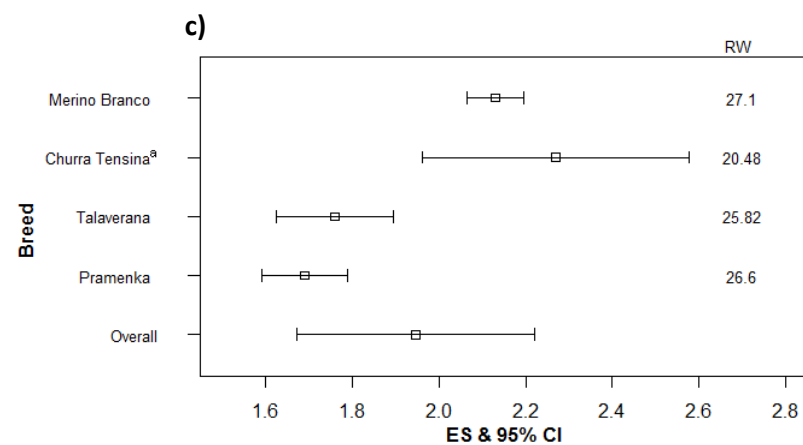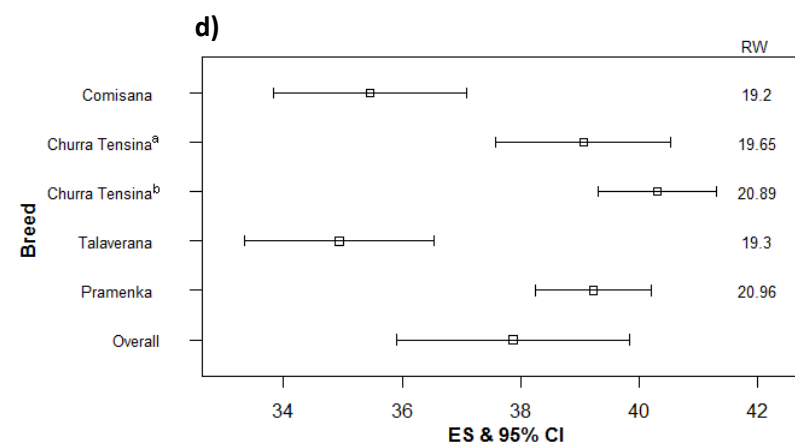

**Figure 2.** Meta-analysis of C18:1 (a), C18:2 n-6 (b), C18:3 n-3 (c) and MUFA (d). <sup>a, b</sup>: different letters in superscript indicate lambs of the same breed included in different studies; ES: effect size; CI: confidence interval; RW: relative weight of the study; Overall: overall pooled result.

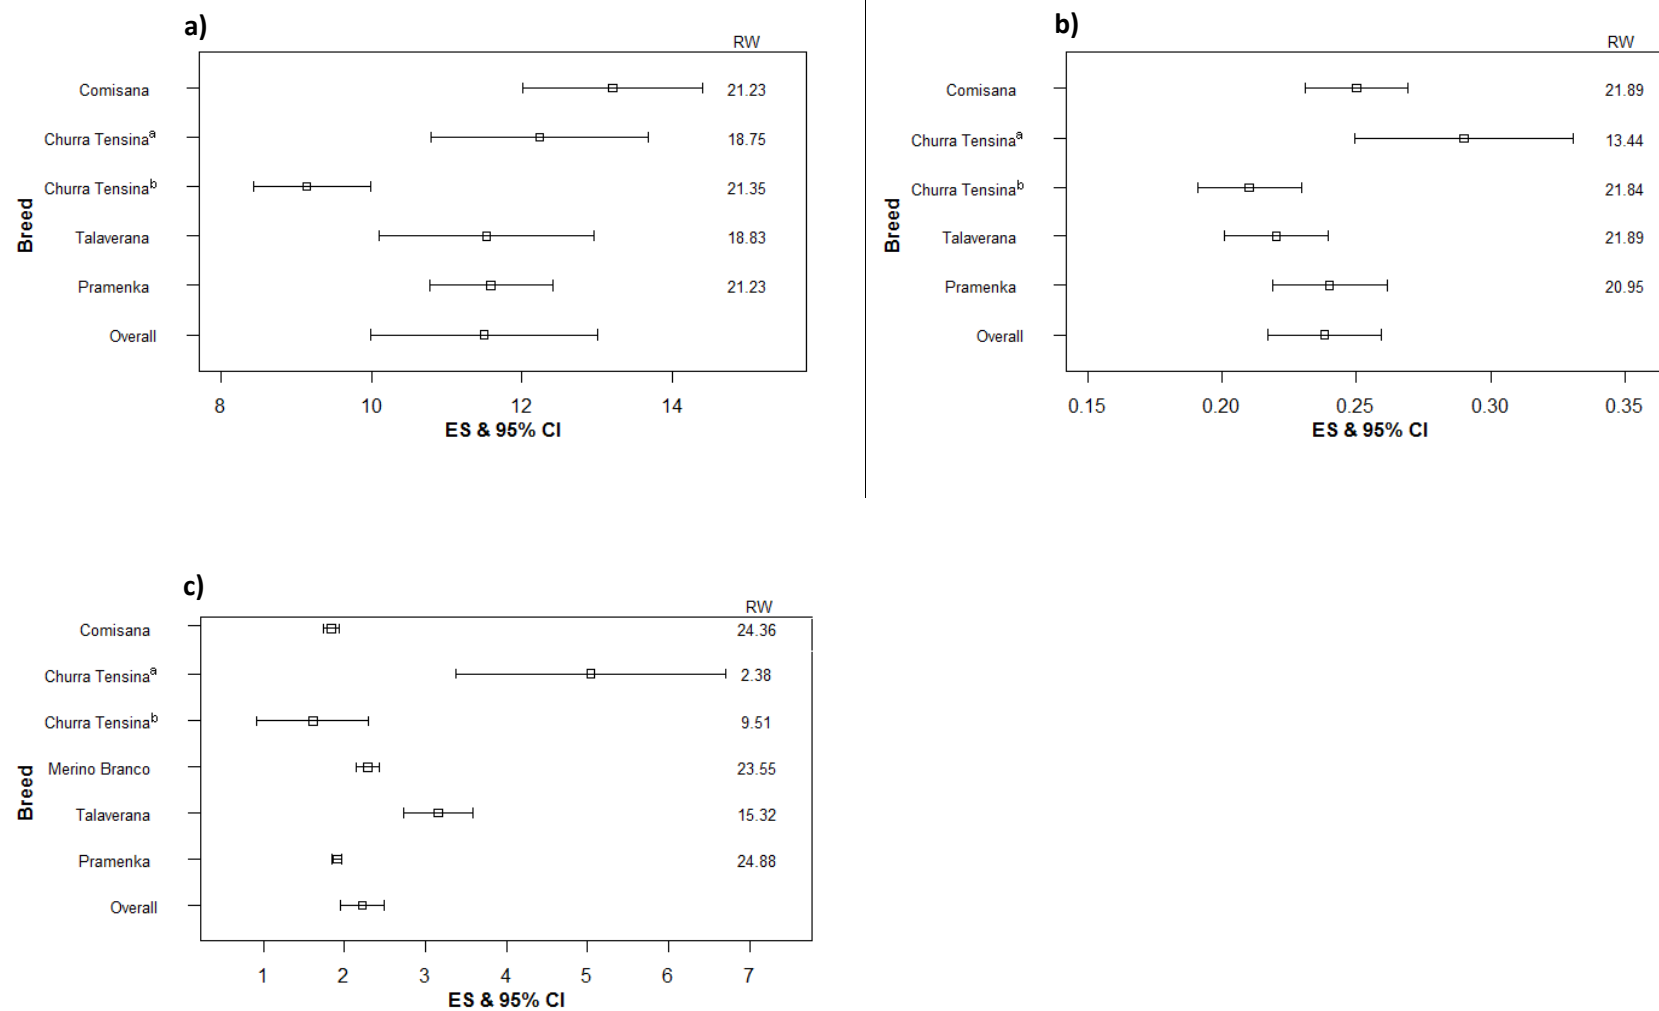

**Figure 3.** Meta-analysis of PUFA (**a**), PUFA/SFA ratio (**b**) and n-6/n-3 ratio (**c**). <sup>a, b</sup>: different letters in superscript indicate lambs of the same breed included in different studies; ES: effect size; CI: confidence interval; RW: relative weight of the study; Overall: overall pooled result.
